# Supplementary material
Source: PubMed Central journal article supplement (PMC3953126)
Supplement: NIHMS559133-supplement-Supplementary_Figure_1.pdf [file NIHMS559133-supplement-Supplementary_Figure_1.pdf]

## Supplementary Figure 1

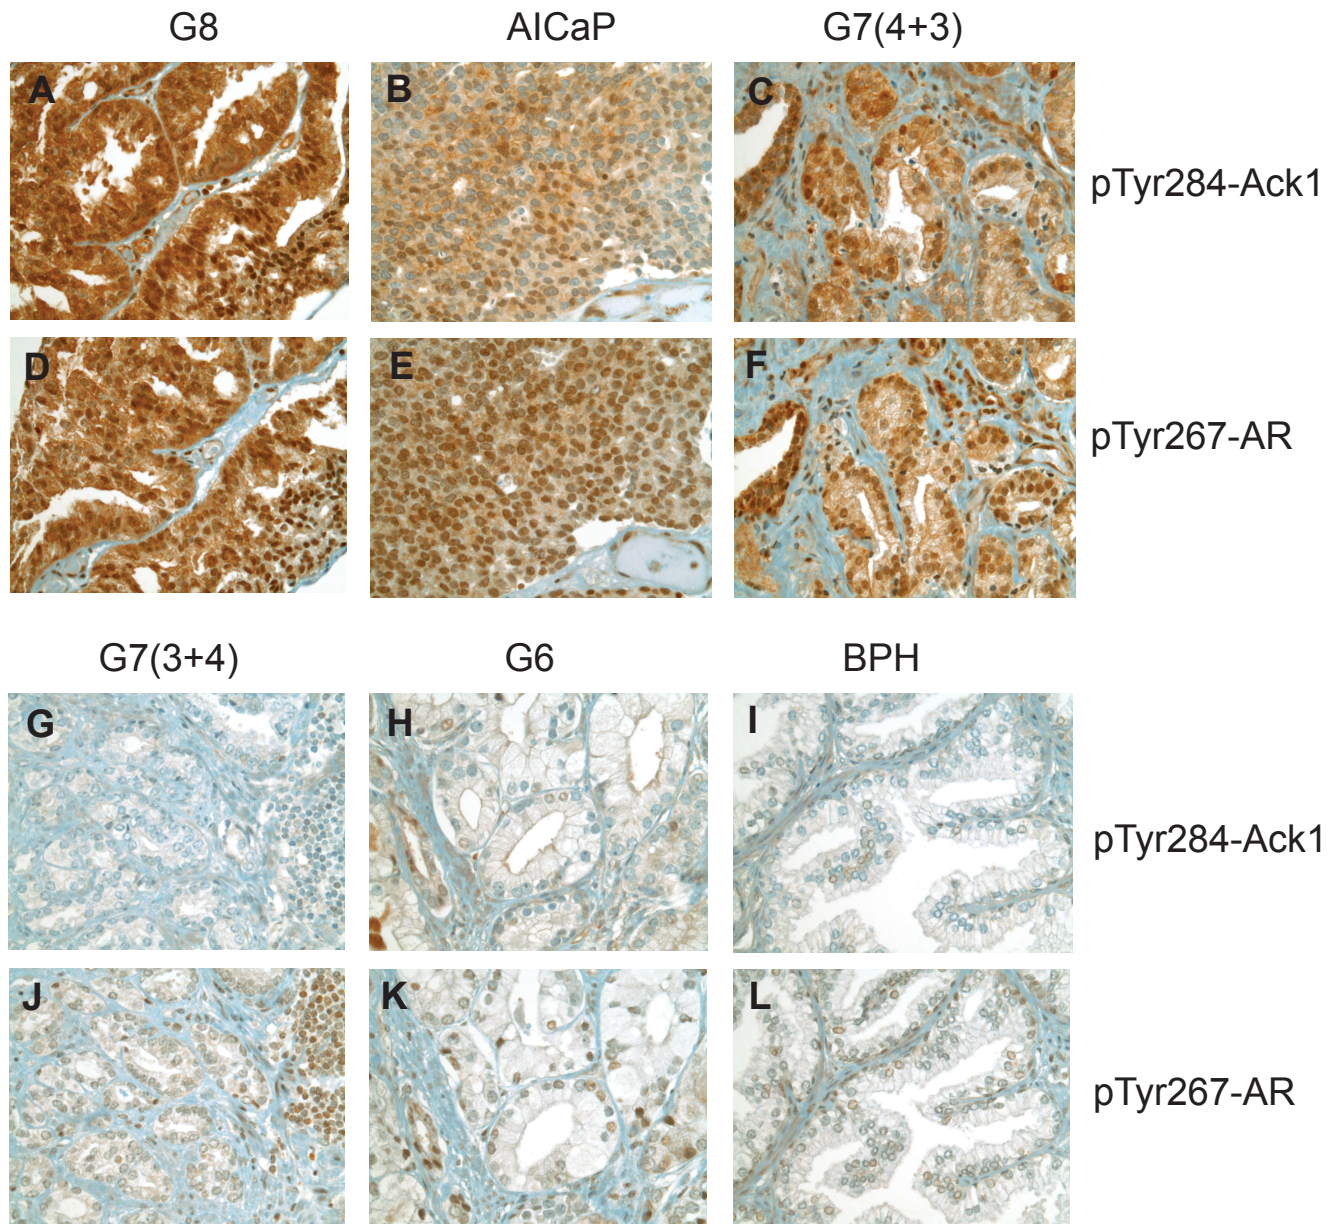

**Supplementary Figure 1. pTyr284-Ack1 expression correlates with pTyr267-AR.** Prostate TMA samples were stained with pTyr284-Ack1 and pTyr267-AR antibodies.
